# Supplementary material for: USP9X Downregulation Renders Breast Cancer Cells Resistant to Tamoxifen
Source: Oxford University Press journal article supplement (doi:10.1158/0008-5472.can-13-1960), 2014-07-14
Supplement: 00085472can131960-sup-116402_3_data_set_2425682_n3xbp7.pdf [file 00085472can131960-sup-116402_3_data_set_2425682_n3xbp7.pdf]

***American Association for Cancer Research: Conflict of Interest Disclosure***

**Journal** \_\_\_\_\_

**Manuscript number** \_\_\_\_\_

**Author's name** \_\_\_\_\_

**AUTHORS: Complete this form ONLY as it relates to the manuscript you are currently submitting**

- Cite by company name or other description, all commercial and/or financial relationships within the past 3 years that may be relevant *to the topic of the manuscript* and might be perceived as a real or potential conflict of interest.
- “*Relevant*” means that the relationship involves the same or similar subject matter; the same, similar or competing drug or device, product or service, intellectual property or asset; or has the potential to result in financial, professional or other personal gain or loss for you or an immediate family member (spouse or child).
- A “*major*” relationship is defined as one in which you personally received \$10,000 or more during any 12-month period, or you own the equivalent in voting stock or share of the entity.
- A “*minor*” relationship is defined as one in which you personally received an amount less than \$10,000 during any 12-month period, or you own the equivalent in voting stock or share of the entity.
- **IF THERE IS NO RELATIONSHIP RELEVANT TO THE MANUSCRIPT'S SUBJECT, INDICATE “NONE” IN THE APPROPRIATE CATEGORIES ON THE CHART (NEXT PAGE).**

**NOTE:** In order to save this form for submission, with manuscript files, in SmartSubmit you must have Adobe Acrobat Reader 9.0 or higher. You can download a free version at  <http://www.adobe.com/products/acrobat/readstep2.html>

### ***Conflict of Interest Disclosure Form***

| <b>Relevant Relationship</b>                                  | <b>Major:<br/>\$10,000 or more<br/>(name of entity)</b> | <b>Minor:<br/>&lt; \$10,000<br/>(name of entity)</b> | <b>None</b> |
|---------------------------------------------------------------|---------------------------------------------------------|------------------------------------------------------|-------------|
| Employment (other than primary affiliation, e.g., consulting) |                                                         |                                                      |             |
| Commercial Research Grant                                     |                                                         |                                                      |             |
| Other Commercial Research Support                             |                                                         |                                                      |             |
| Honoraria from Speakers Bureau                                |                                                         |                                                      |             |
| Ownership Interest (including patents)                        |                                                         |                                                      |             |
| Consultant/ Advisory Board                                    |                                                         |                                                      |             |
| Other (e.g., expert testimony—please be specific)             |                                                         |                                                      |             |

***Please attach any additional details as necessary.***

I confirm that the information reported above is accurate. I understand that this information will be disclosed publicly. The AACR reserves the right to decline to publish my work if the Association believes a serious conflict of interest exists. I understand that failure to complete this form will disqualify my manuscript from consideration for publication. *Failure by any author to disclose a conflict that later comes to light will result in a ban on that author publishing in any AACR journal for a period of 3 years.*

**Author's Name** \_\_\_\_\_

**Signature** \_\_\_\_\_  \_\_\_\_\_ **Date** \_\_\_\_\_
