# Supplementary material for: USP9X Downregulation Renders Breast Cancer Cells Resistant to Tamoxifen
Source: Oxford University Press journal article supplement (doi:10.1158/0008-5472.can-13-1960), 2014-07-14
Supplement: 00085472can131960-sup-116402_3_supp_2425680_n3xb89.xlsx [file 00085472can131960-sup-116402_3_supp_2425680_n3xb89.xlsx]

## Sheet: Sheet1
Supplementary Table
ST3
Patient and tumor characteristics of patients with ERa positive breast cancers
Characteristics	Loi	Buffa	Wang	Wang	Schmidt
			Training set	Validation set
Sample size	250	134	80	129	158 @
Age, years (Median (SD))	63 (10)	57 (10)	54 (13)	*	#
Histologic Grade				*
1	47	30	37		27
2	128	64	12		116
3	40	27	2		15
Unknown	35	13	29
Tumor stage				*
T1	108	55	38		93
T2	136	70	41		62
T3	6	9	1		3
Lymph node status
Negative	110	78	80	129	158
Positive	132	56
Unknown	8
Adjuvant tamoxifen	Yes	Yes	No	No	No
Median follow-up (years)	7	10	7	7	7
* The validation group did not differ from the total group in any of the characteristics of patients or tumors
(Wang et al. 2005, Lancet)
@ ERα positivity was based on ESR1 gene expression
# The age per individual patient is not available in the public domain. The mean age of the ERa positive and
negative breast cancers patients combined in this data set was 60 (Schmidt et a. 2008, Cancer Research)
